# Supplementary material
Source: publisher site journal article supplement (https://www.dovepress.com/article/289459)
Supplement: Supplementary file 1 [file get_supplementary_file.php]

**Supplementary Table 1** Fusion index procedure cost calculations

| Cost Component | Unit Cost 2020 US$ | Source (for Unit Cost) | Proportion of Patients Requiring | Source (for Proportion of Patients Requiring) | Expected Cost |
| --- | --- | --- | --- | --- | --- |
| Hospital inpatient facility cost for fusion procedure | $41,973.00 | Case weighted average of DRG 456/457/458: Spinal fusion except cervical with spinal curvature, malignancy, infection or 9+ fusions | 100% | N/A | $41,973.00 |
| **Physician Professional Fee Costs** | | | | | |
| Arthrodesis (≤6 vertebral segments) | $1420.85 | CPT code 22800: Arthrodesis, posterior, for spinal deformity, up to 6 vertebral segments | 7% | Calculated from the reported number of instrumented levels for patients from NCT02897453 and Hoernschemeyer 20201, 2 | $96.88 |
| Arthrodesis (7-12 vertebral segments) | $2,203.27 | CPT code 22802: Arthrodesis, posterior, for spinal deformity, 7 to 12 vertebral segments | 93% | Calculated from the reported number of instrumented levels for patients from NCT02897453 and Hoernschemeyer 20201, 2 | $2,053.05 |
| Posterior segmental instrumentation (≤6 vertebral segments) | $800.47 | CPT code +22842: Posterior segmental instrumentation, 3 to 6 vertebral segments | 7% | Calculated from the reported number of instrumented levels for patients from NCT02897453 and Hoernschemeyer 20201, 2 | $54.58 |
| Posterior segmental instrumentation (7-12 vertebral segments) | $855.32 | CPT code +22843: Posterior segmental instrumentation, 7 to 12 vertebral segments | 93% | Calculated from the reported number of instrumented levels for patients from NCT02897453 and Hoernschemeyer 20201, 2 | $797.00 |
| X-ray | $180.45 | CPT code 72082: X-ray spine, entire, survey, anteroposterior and lateral, routine | 100% | Assumption, based on Luhmann et al 20183 | $180.45 |
| Intraoperative neurophysiological monitoring | $282.67 | CPT code 95940: Intraoperative neurophysiological monitoring | 90% | Assumption, based on Luhmann et al 20183 | $254.40 |
| Anesthesia | $407.00 | CPT code 00620: Anesthesia | 100% | Assumption, based on Luhmann et al 20183 | $407.00 |
| **Mean Cost of Index Fusion Procedure to The US Integrated Healthcare Delivery System** | | | | | **$45,816.35** |

**Abbreviations**: CPT, Current Procedural Terminology; DRG, Diagnosis-related group; N/A, not available.

Supplementary Table 2 Fusion transition probabilities

| **Time point (quarters after index fusion procedure)** | **Actuarial fusion survival at timepoint4** | **Drop in Actuarial Fusion Survival by Timepoint** | **Average Quarterly Rate of Fusion Re­Operation Up to Timepointa** | **Transition Probabilities Used to Inform** | **Calculated Transition Probabilitya** |
| --- | --- | --- | --- | --- | --- |
| 1 | 98.3% | 1.7% | 1.70 | Index (Fusion) to Revision 1 (Fusion)  Revision 1 (Fusion) to Revision 2 (Fusion)  Revision 2 (Fusion) to Ineligible (Fusion) | 1.69% |
| 40 | 89.8% | 10.2% | 0.22 (excluding quarters 0 to 1) | Postoperative (Fusion) to Revision 1 (Fusion)  Postoperative (Fusion Revision 1) to Revision 2 (Fusion)  Postoperative (Fusion Revision 2) to Ineligible (Fusion) | 0.0022 |
| 1 | 98.3% | 1.7% | 1.70 | Index (Fusion) to Revision 1 (Fusion)  Revision 1 (Fusion) to Revision 2 (Fusion)  Revision 2 (Fusion) to Ineligible (Fusion) | 1.69% |
| 40 | 89.8% | 10.2% | 0.22 (excluding quarters 0 to 1) | Postoperative (Fusion) to Revision 1 (Fusion)  Postoperative (Fusion Revision 1) to Revision 2 (Fusion)  Postoperative (Fusion Revision 2) to Ineligible (Fusion) | 0.0022 |

**Notes**: aAssuming constant rate of fusion re-operation.

Supplementary Table 3 VBT index procedure cost calculations

| **Component** | **Unit Cost 2020 US$** | **Source (for Unit Cost)** | **Number Required** | **Source (for Number Required)** | **Expected Cost 2020 US$** |
| --- | --- | --- | --- | --- | --- |
| Baseline procedure costs | $28,616.35 | Assumed same as baseline costs for index fusion procedure; assumed fusion device cost $17,200 | 1 | N/A | $28,616.35 |
| **Device Costs** | | | | | |
| VBT Cord | $5,871.00 | Device Manufacturer 2020 List Price (Zimmer Biomet) | 1 | 1 cord required per procedure | $5,871.00 |
| VBT Anchor | $800.00 | Device Manufacturer 2020 List Price (Zimmer Biomet) | 7.625 | Mean number required in NCT02897453 and Hoernschemeyer studies1, 2 | $6,100.00 |
| VBT Instrumented Level | $5,068.00 | Device Manufacturer 2020 List Price (Zimmer Biomet) | 7.625 | Mean number required in NCT02897453 and Hoernschemeyer studies1, 2 | $38,643.50 |
| **Mean Cost of an Index VBT Procedure to the Us Integrated Health Care Delivery System** | | | | | **$79,230.85** |

**Abbreviations**: N/A, not available; VBT, anterior vertebral body tethering.

**Supplementary Table 4:** VBT transition probabilities

| **Event Type** | **Combined Number of Eventsa** | **Combined Relevant Follow-Upa** | **Calculated Quarterly Event Rateb** | **Transition Probabilities Used to Inform** | **Calculated Quarterly Transition Probabilityb** |
| --- | --- | --- | --- | --- | --- |
| VBT revision procedure | 12 | 1,547 total quarters of follow-up after index VBT procedure | 0.0078 per quarter | Index (VBT) to Revision (VBT)  Postoperative (VBT) to Revision (VBT)  Revision (VBT) to Revision (VBT) | 0.77% |
| Fusion procedure for patients with prior index VBT procedure | 3 | 1,547 total quarters of follow-up after index VBT procedure | 0.0019 per quarter | Postoperative (VBT) to Index (Fusion) | 0.19% |
| Fusion procedure for patients with prior VBT revision procedure | 1 | 84 total quarters of follow-up after VBT revision procedures | 0.0119 per quarter | Revision (VBT) to Index (Fusion) | 1.18% |

aCombined across NCT02897453 and Hoernschemeyer et al (2020);1, 2 bAssuming constant rate of fusion revision. **Abbreviations**: VBT, anterior vertebral body tethering.

**Supplementary References**

1. Hoernschemeyer DG, Boeyer ME, Robertson ME, et al. Anterior Vertebral Body Tethering for Adolescent Scoliosis with Growth Remaining: A Retrospective Review of 2 to 5-Year Postoperative Results. *J Bone Joint Surg Am.* 2020;102:1169–76.

2. Zimmer Biomet. The Tether™ Vertebral Body Tethering System [Instructions for Use]. U.S. Food and Drug Administration website. https://www.accessdata.fda.gov/cdrh_docs/pdf19/H190005D.pdf. Revised June 2019. Accessed October 26, 2020. .

3. Luhmann SJ, McAughey EM, Ackerman SJ, et al. Cost analysis of a growth guidance system compared with traditional and magnetically controlled growing rods for early-onset scoliosis: a US-based integrated health care delivery system perspective. *Clinicoecon Outcomes Res.* 2018;10:179–87.

4. Ahmed SI, Bastrom TP, Yaszay B, et al. 5-Year Reoperation Risk and Causes for Revision After Idiopathic Scoliosis Surgery. *Spine (Phila Pa 1976)*. 2017;42:999–1005.
